# Supplementary material for: Boosting up the electrical performance of low-grade PEDOT:PSS by optimizing non-ionic surfactants
Source: Royal Society of Chemistry journal article supplement (doi:10.1039/c7nr05584f), 2017-01-01
Supplement: c7nr05584f1.pdf [file c7nr05584f1.pdf]

## Supporting information

### Boosting up the Electrical Performance of Low-Grade PEDOT:PSS by Optimizing Non-Ionic Surfactants

Sunghye Kim,<sup>‡a,c</sup> Sunghwan Cho,<sup>‡a,b</sup>, Su Jeong Lee,<sup>a</sup> Gilwoon Lee,<sup>d</sup> Minsik Kong,<sup>d</sup>  
Sunghmin Moon,<sup>d</sup> Jae-min Myoung,<sup>\*a</sup> and Unyong Jeong<sup>\*d</sup>

- a. Department of Materials Science and Engineering, Yonsei University, 50 Yonsei-ro, Seodaemun-gu, Seoul 03722, Republic of Korea.
- b. Center for Advanced Soft Electronics (CASE), 77 Cheongam-Ro, Nam-Gu, Pohang, Gyeongbuk, Korea, 37673, Republic of Korea
- c. Research and Development Center, LG Display, 245 Lg-ro, Wollong-myeon, Paju-si, Gyeonggi-do 10845, Republic of Korea
- d. Department of Materials Science and Engineering, Pohang University of Science and Technology (POSTECH), 77 Cheongam-Ro, Nam-Gu, Pohang 37673, Republic of Korea.

‡ These authors contributed equally to this work.

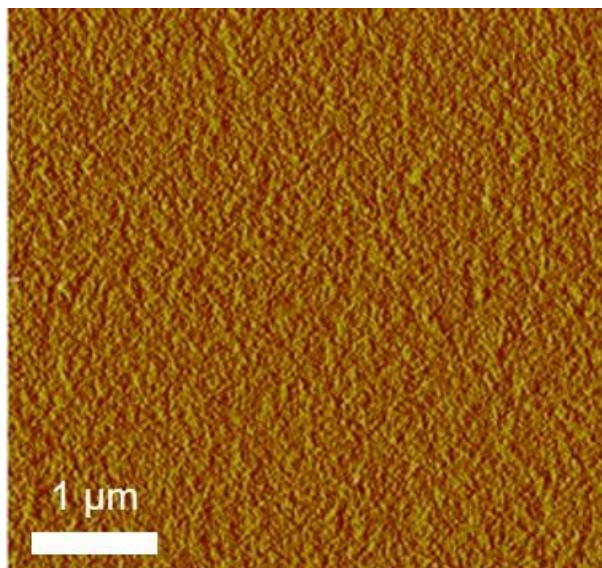

**Fig. S1** AFM image of the high-grade PEDOT:PSS (Clevious P). Small PEDOT nanoparticles clump together to form a continuous film in the absence of the surfactant.

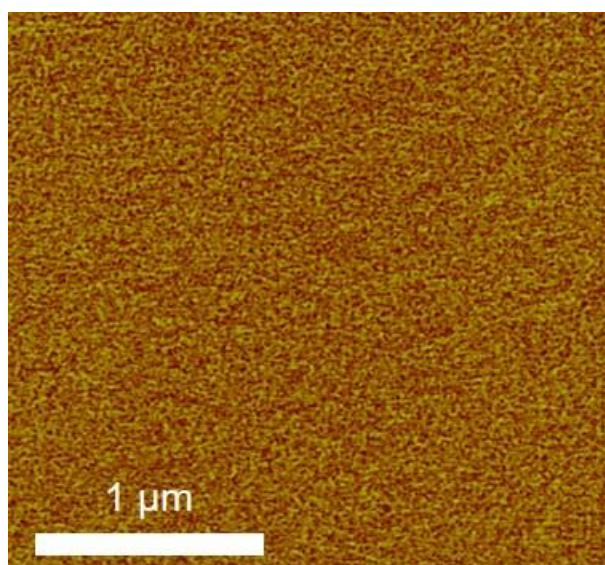

**Fig. S2** AFM image of the low-grade PEDOT:PSS thin film.

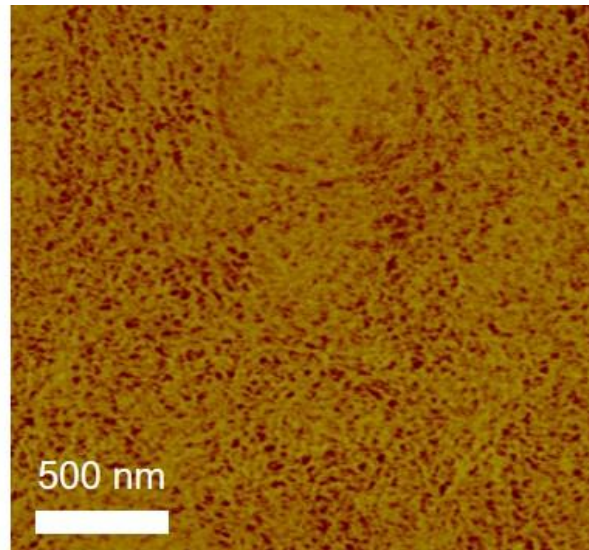

**Fig. S3** AFM image of the low-grade PEDOT:PSS film when the surfactant (Triton X-100) was added more than maximum solubility ( $f_s = 0.85$ ). The surfactant formed PEDOT nanofibrils and the excess surfactant was microphase separated.

a) another low-grade PEDOT:PSS

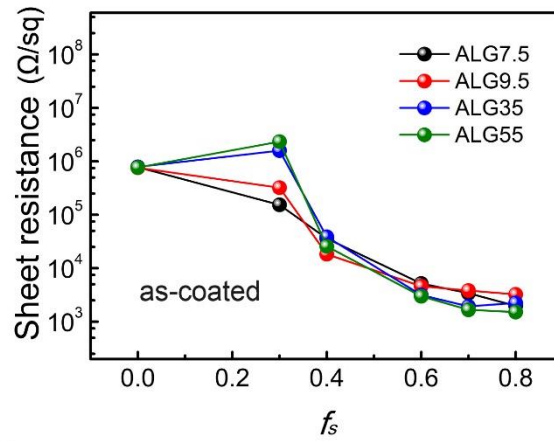

b)

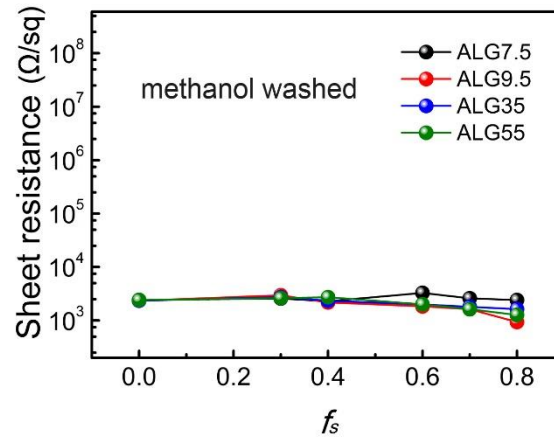

**Fig. S4** Changes in sheet resistance of the another low-grade PEDOT:PSS thin films as a function of the surfactant concentration. The thickness of the films was fixed at 100 nm for all the specimen. a) Sheet resistances of the as-coated films of the ALG. b) Sheet resistances after washing with methanol for the ALG film.

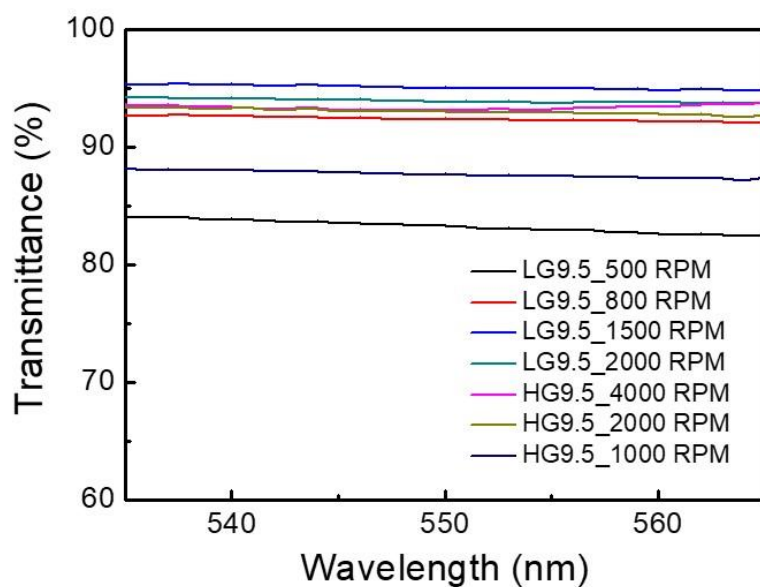

**Fig. S5** The transmittance of the methanol washed LG and HG thin films obtained under various coating conditions.

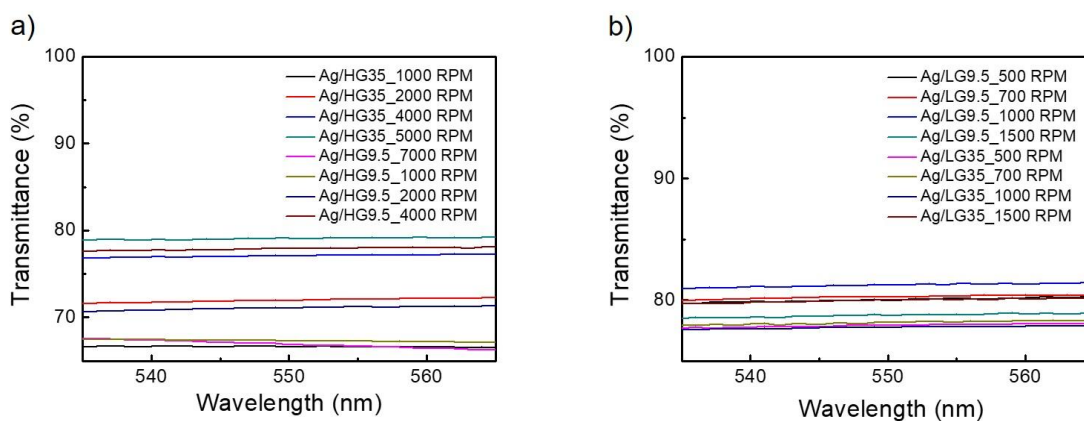

**Fig. S6** The transmittance of the Ag NW/PEDOT:PSS hybrid electrodes. a) Hybrid electrodes made of the high-grade PEDOT:PSS and b) hybrid electrodes made of the low-grade PEDOT:PSS. The surfactants of  $n = 9.5$  and  $35$  were used. The samples were washed with methanol.
